# Supplementary material
Source: publisher figshare collection journal article supplement (https://sage.figshare.com/ndownloader/files/15254927)
Supplement: Supplementary file 1 [file 15254927]

**Supplemental table 1. Quality control recommendations for macular OCTA images**

|                             |                                                                                                                                                                                                                                                                                     |
|-----------------------------|-------------------------------------------------------------------------------------------------------------------------------------------------------------------------------------------------------------------------------------------------------------------------------------|
| <b>Image acquisition</b>    | 1. Establish adequate light exposure and image focus at outset of acquisition                                                                                                                                                                                                       |
|                             | 2. Minimize manual adjustments during the acquisition                                                                                                                                                                                                                               |
|                             | 3. Prompt patient to remain focused on the target                                                                                                                                                                                                                                   |
| <b>Image processing</b>     | 1. Crop image to a standard size                                                                                                                                                                                                                                                    |
|                             | 2. Center the fovea                                                                                                                                                                                                                                                                 |
| <b>Recognizing artifact</b> | 1. Motion artifact <ul style="list-style-type: none"><li>A. Poor contrast between the vasculature and the background</li><li>B. Streaking effect (multiple horizontal lines) over the capillary architecture</li><li>C. May be most prominent in peripheries of the image</li></ul> |
|                             | 2. Loss of focus artifact <ul style="list-style-type: none"><li>A. Poor definition of the outline of the major arterioles</li><li>B. Loss of definition of the capillary architecture, or total capillary dropout</li></ul>                                                         |
